# Supplementary material for: RSK2-Mediated ELK3 Activation Enhances Cell Transformation and Breast Cancer Cell Growth by Regulation of c-fos Promoter Activity
Source: MDPI journal article supplement (doi:10.3390/ijms20081994), 2019-04-23

[Supplementary Information]

**RSK2-mediated ELK3 activation enhances cell transformation and breast cancer cell growth by regulation of c-fos promoter activity**

Sun-Mi Yoo<sup>1</sup>, Cheol-Jung Lee<sup>1</sup>, Hyun-Jung An<sup>1</sup>, Joo-Young Lee<sup>1</sup>, Hye-Suk Lee<sup>1</sup>, Han Chang Kang<sup>1</sup>, Sung-Jun Cho<sup>2</sup>, Seung-Min Kim<sup>1</sup>, Juhee Park<sup>1</sup>, Dae-Joon Kim<sup>3</sup>, Yong-Yeon Cho<sup>1,\*</sup>

Contents:

1. Supplementary Table legends: S1
2. Supplementary Figure legends: S1-S4

Supplementary Table 1

| normal tissues    |      |      |      |      |      |      |      |
|-------------------|------|------|------|------|------|------|------|
| tissues           | RSK1 | RSK2 | RSK3 | RSK4 | ELK1 | ELK3 | ELK4 |
| adipose tissue    | 0    | 0    | 0    | 0    | 0    | 0    | 0    |
| adrenal gland     | 30   | 30   | 91   | 0    | 0    | 60   | 30   |
| ascites           | 125  | 125  | 50   | 0    | 25   | 0    | 25   |
| bladder           | 0    | 33   | 0    | 0    | 33   | 0    | 66   |
| blood             | 163  | 32   | 24   | 0    | 8    | 0    | 8    |
| bone              | 27   | 83   | 27   | 0    | 13   | 0    | 69   |
| bone marrow       | 143  | 61   | 0    | 0    | 0    | 41   | 41   |
| brain             | 17   | 9    | 110  | 6    | 16   | 20   | 31   |
| cervix            | 103  | 20   | 0    | 0    | 61   | 20   | 41   |
| connective tissue | 53   | 26   | 73   | 6    | 6    | 26   | 26   |
| ear               | 0    | 62   | 0    | 0    | 0    | 62   | 0    |
| embryonic tissue  | 42   | 51   | 32   | 4    | 18   | 23   | 37   |
| esophagus         | 49   | 49   | 0    | 0    | 0    | 99   | 0    |
| eye               | 38   | 28   | 95   | 23   | 52   | 4    | 62   |
| heart             | 33   | 22   | 44   | 0    | 0    | 55   | 55   |
| intestine         | 94   | 34   | 8    | 0    | 12   | 17   | 30   |
| kidney            | 14   | 56   | 33   | 23   | 0    | 0    | 99   |
| larynx            | 0    | 0    | 85   | 0    | 0    | 0    | 0    |
| liver             | 38   | 82   | 4    | 0    | 4    | 48   | 29   |
| lung              | 77   | 47   | 50   | 17   | 20   | 29   | 59   |
| lymph             | 361  | 0    | 0    | 0    | 22   | 0    | 45   |
| lymph node        | 122  | 22   | 22   | 0    | 11   | 144  | 100  |
| mammary gland     | 26   | 59   | 105  | 6    | 6    | 39   | 52   |
| mouth             | 105  | 45   | 30   | 0    | 0    | 90   | 45   |
| muscle            | 37   | 112  | 65   | 0    | 0    | 18   | 75   |
| nerve             | 0    | 0    | 0    | 0    | 0    | 0    | 0    |
| ovary             | 108  | 39   | 49   | 9    | 29   | 0    | 29   |
| pancreas          | 14   | 46   | 42   | 23   | 9    | 4    | 32   |
| parathyroid       | 48   | 48   | 97   | 97   | 0    | 0    | 0    |
| pharynx           | 24   | 73   | 0    | 0    | 0    | 49   | 24   |
| pituitary gland   | 0    | 0    | 60   | 0    | 0    | 0    | 0    |
| placenta          | 14   | 35   | 10   | 3    | 10   | 24   | 17   |
| prostate          | 42   | 68   | 79   | 5    | 15   | 5    | 89   |
| salivary gland    | 0    | 0    | 98   | 0    | 0    | 0    | 49   |
| skin              | 52   | 75   | 33   | 4    | 9    | 42   | 37   |
| spleen            | 430  | 74   | 37   | 0    | 0    | 37   | 37   |
| stomach           | 94   | 62   | 10   | 0    | 31   | 10   | 31   |
| testis            | 41   | 25   | 39   | 16   | 18   | 16   | 29   |
| thymus            | 188  | 37   | 25   | 0    | 25   | 37   | 75   |
| thyroid           | 171  | 128  | 257  | 42   | 42   | 42   | 64   |
| tonsil            | 176  | 0    | 0    | 0    | 0    | 0    | 0    |
| trachea           | 77   | 77   | 96   | 19   | 0    | 154  | 57   |
| umbilical cord    | 72   | 0    | 72   | 0    | 0    | 145  | 0    |
| uterus            | 43   | 43   | 25   | 17   | 38   | 103  | 56   |
| vascular          | 19   | 116  | 38   | 0    | 0    | 232  | 19   |

**Supplementary Table S1.** EST gene expression profiles of RSKs and ELKs. Transcripts amount of human RSKs and ELKs, including RSK1 ([Hs.149957](#)), RSK2 (Hs.445387), RSK3 (Hs.655277), RSK4 (Hs.234478), ELK1 (Hs.181128), ELK3 (Hs.46523) and ELK4 (Hs.497520) were downloaded from UniGene (<https://www.ncbi.nlm.nih.gov/unigene/?term=>) and the approximate gene expression patterns were summarized. The numbers indicate specific gene transcripts per million counted transcripts. The red color indicates the highest number of EST count for RSKs or ELKs.

Supplementary Figure S1 by Yoo et al

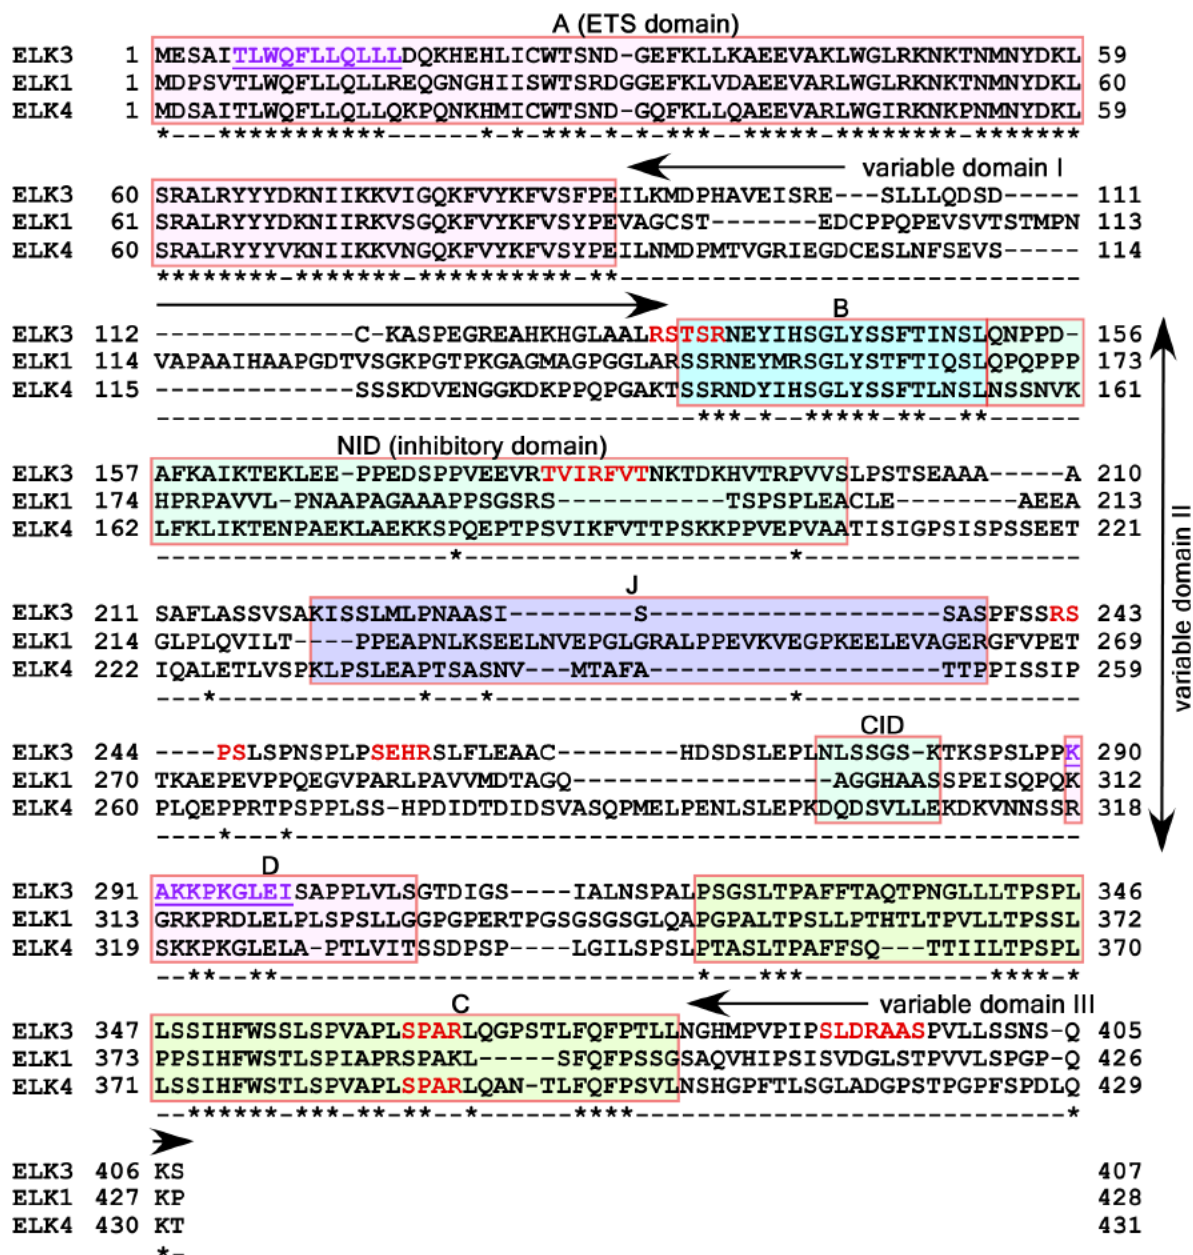

**Supplementary Figure S1.** Alignment of amino acid sequences of ELK1, ELK3, and ELK4. The A, B, NID, J, CID, D, and C domains of the ELKs are boxed with different colors. Conserved amino acids are noted with star marks in the bottom line. Putative RSK2 phosphorylation motifs in the ELK domains are highlighted as red letters.

# Supplementary Figure S2a+S2b by Yoo et al

(a)

|      |     |                               |     |
|------|-----|-------------------------------|-----|
| S133 | 127 | AAL <b>R</b> ST <b>S</b> RNE  | 136 |
| S131 | 137 | YEN <b>R</b> ST <b>S</b> RLA  | 128 |
| T187 | 181 | TVI <b>R</b> FV <b>T</b> NKT  | 190 |
| T181 | 189 | TVF <b>R</b> IV <b>T</b> RVE  | 178 |
| S245 | 239 | FSS <b>R</b> SP <b>S</b> LSP  | 248 |
| S254 | 260 | FLS <b>R</b> HES <b>S</b> PLP | 251 |
| S363 | 369 | GQL <b>R</b> AP <b>S</b> LPA  | 360 |
| S396 | 390 | SLD <b>R</b> AAS <b>S</b> PVL | 399 |
| S390 | 396 | SA <b>A</b> RDLS <b>S</b> PIP | 387 |

RSK2 phospho-target : **RxxS/T**  
consensus sequence

(b)

GPS analysis of ELK3

| Sequence                  | Position | Score  | Cutoff |
|---------------------------|----------|--------|--------|
| HGLAALR <b>S</b> TSRNEYI  | 131      | 11.147 | 8.112  |
| LAALRST <b>S</b> RNEYIHS  | 133      | 10.882 | 8.112  |
| YSSFTIN <b>S</b> LQNPPDA  | 150      | 9.147  | 8.112  |
| LMLPNAAS <b>S</b> ISSASPF | 232      | 12.147 | 8.112  |
| PFSSRSP <b>S</b> LSPNSPL  | 245      | 10.382 | 8.112  |
| SPNSPKP <b>S</b> EHRSFL   | 254      | 8.765  | 8.112  |
| LEPLNL <b>S</b> SGSKTKSP  | 278      | 9.529  | 8.112  |
| LSPVAPL <b>S</b> PARLQGP  | 363      | 13.382 | 8.112  |
| PSLDRAAS <b>S</b> PVLLSSN | 396      | 10.618 | 8.112  |

RSK2 phospho-target consensus sequence: **RxxS/T**

**Supplementary Figure S2.** Summary of putative RSK2 phospho-motifs in ELK3. (a) Amino acid alignment of putative RSK2 phospho-motif, RxxS/T, in ELK3. (b) Group-based prediction system (GPS) analysis of phosphorylation sites. Kinase-specific phosphorylation site prediction analysis was performed by using the GPS against RSK2. (a and b) The analysis results were compared to the RSK2 phospho-motif. Amino acids 131, 133, 245, 254, 363 and 396 matched with (a) and (b) analysis.

Supplementary Figure S3a+S3b by Yoo et al

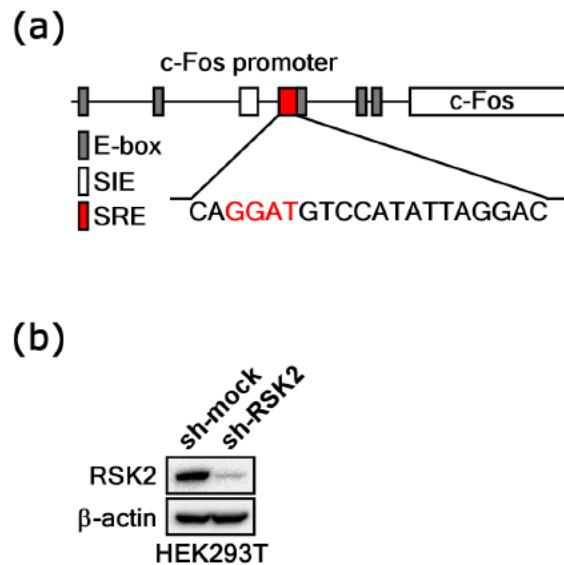

**Supplementary Figure S3.** *Cis* elements of the *c-fos*-luciferase reporter plasmid and confirmation of RSK2 knockdown. (a) The ELK3 binding consensus nucleotide sequence is highlighted in red. (b) HEK293T cells stably expressing sh-mock or sh-RSK2 were established and RSK2 knockdown was confirmed by the western blotting results.  $\beta$ -actin was used as the internal control for equalized protein loading.

Supplementary Figure S4a+S4b by Yoo et al

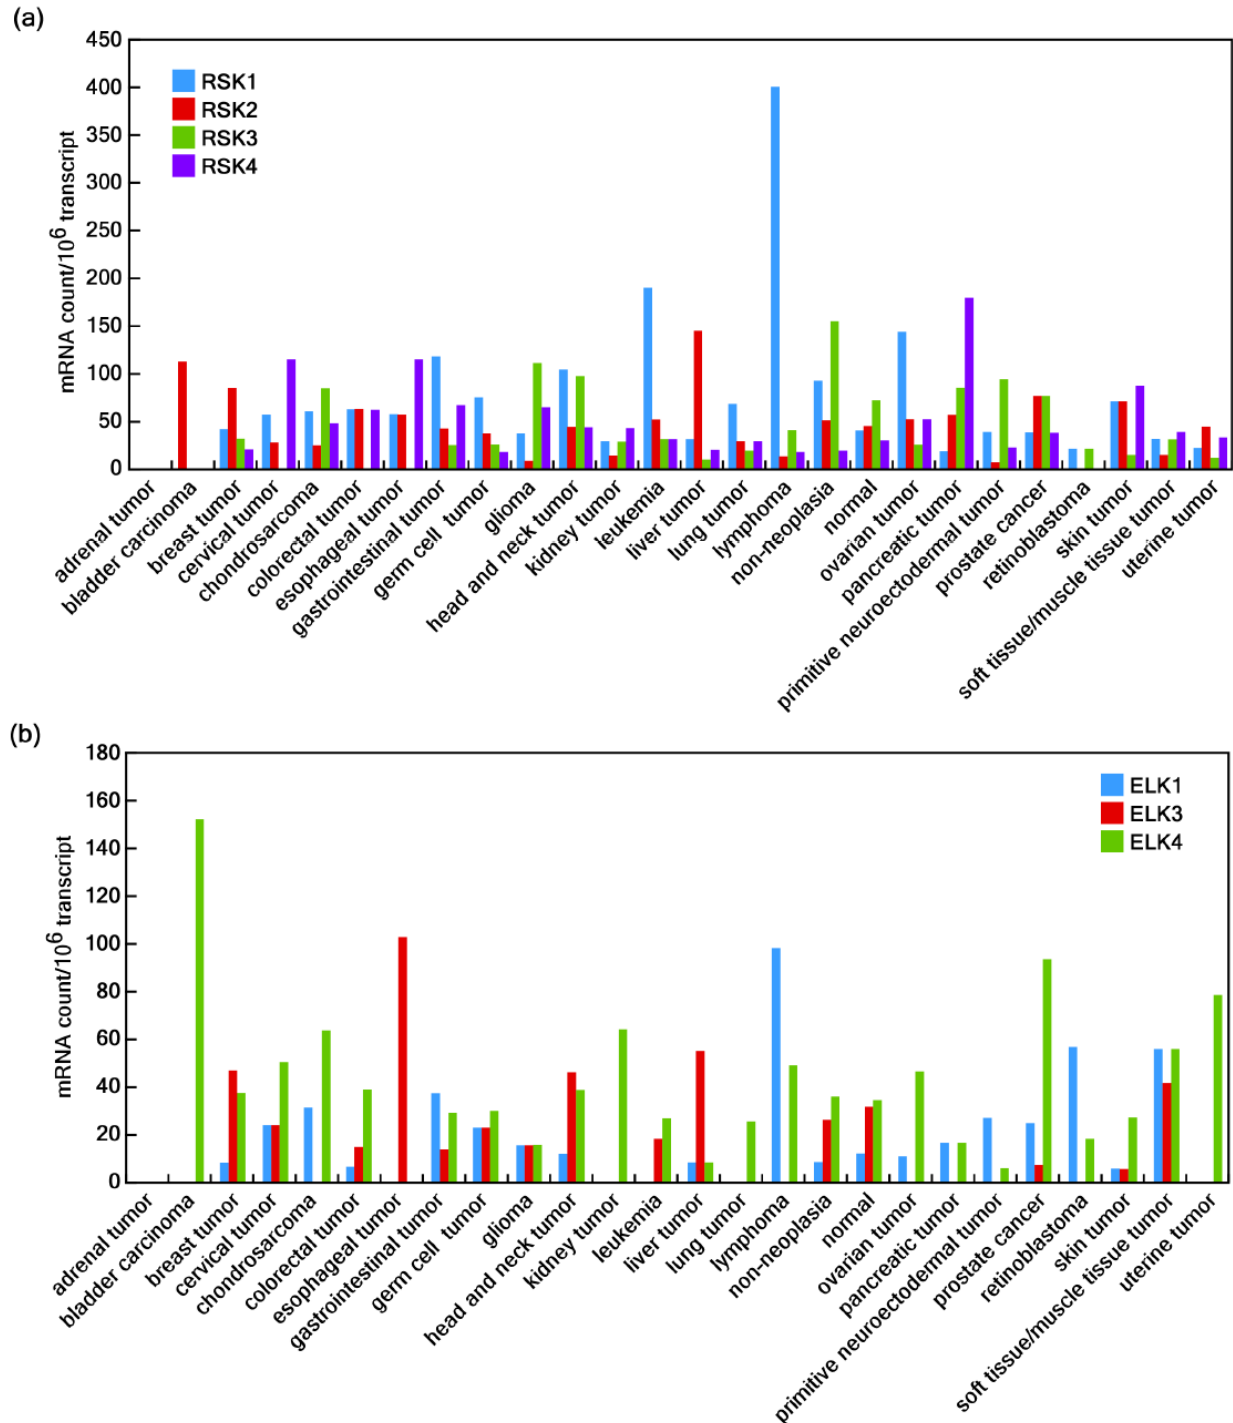

Supplement: s1 [file s1]
